# Supplementary material
Source: MDPI journal article supplement (https://www.mdpi.com/2076-3417/12/21/11069)
Supplement: s1 [file s1]

# A mathematical model for bioremediation of hydrocarbon-contaminated soils

Gilberto Martins<sup>1,2\*</sup>, Sara Campos<sup>1</sup>, Ana Ferreira<sup>1</sup>, Rita Castro<sup>1,2</sup>, Salomé Duarte<sup>1,2</sup>, Ana J. Cavaleiro<sup>1,2</sup>

<sup>1</sup> CEB – Centre of Biological Engineering, University of Minho, Campus de Gualtar, 4710-057 Braga, Portugal

<sup>2</sup> LABBELS – Associate Laboratory, Braga | Guimarães, Portugal.

**Table S1.** Stoichiometry of the main processes involved in hexadecane biodegradation

| Reaction                                                                                                                                    | Oxidation/Reduction couple |
|---------------------------------------------------------------------------------------------------------------------------------------------|----------------------------|
| <b>Biodegradation coupled to aerobic respiration</b><br>$C_{16}H_{34} + 24.5 O_2 \rightarrow 16 HCO_3^- + H_2O + 16H^+$                     | $O_2 / H_2O$               |
| <b>Biodegradation coupled to denitrification</b><br>$C_{16}H_{34} + 19.6 NO_3^- + 3.6 H^+ \rightarrow 16 HCO_3^- + 9.8 N_2 + 10.8 H_2O$     | $NO_3^- / N_2$             |
| <b>Biodegradation coupled to Fe(III) reduction</b><br>$C_{16}H_{34} + 98 Fe^{3+} + 48 H_2O \rightarrow 98 Fe^{2+} + 16 HCO_3^- + 114 H^+$   | $Fe^{3+} / Fe^{2+}$        |
| <b>Biodegradation coupled to sulfate reduction</b><br>$C_{16}H_{34} + 12.25 SO_4^{2-} + 8.5 H^+ \rightarrow 16 HCO_3^- + 12.25 H_2S + H_2O$ | $SO_4^{2-} / H_2S$         |
| <b>Biodegradation coupled to methanogenesis</b><br>$C_{16}H_{34} + 11.25 H_2O \rightarrow 3.75 HCO_3^- + 12.25 CH_4 + 3.75H^+$              | $HCO_3^- / CH_4$           |

\* Corresponding author: Gilberto Martins, Tel.: +351 253601986; email: gilberto.martins@deb.uminho.pt

**Table S2.** Stoichiometric (Petersen) and composition matrix for the bioremediation model

| Component<br>Process                             | C_C16H34                                    | C_NO3                                       | C_SO4                                       | C_CH4                | C_Fe2+            | C_O2                | X_aer | X_dnb | X_srb | X_irb | X_met | S_C16H34 | S_NO3 | S_SO4 | S_Fe3+ |
|--------------------------------------------------|---------------------------------------------|---------------------------------------------|---------------------------------------------|----------------------|-------------------|---------------------|-------|-------|-------|-------|-------|----------|-------|-------|--------|
| 1. Aerobic biodegradation                        | $-\frac{1}{113}$                            |                                             |                                             |                      |                   | $-\frac{24.5}{113}$ | 1     |       |       |       |       |          |       |       |        |
| 2. Death of aerobic bacteria                     |                                             |                                             |                                             |                      |                   |                     | -1    |       |       |       |       |          |       |       |        |
| 3. Biodegradation coupled to denitrification     | $-\frac{1}{113}$                            | $-\frac{19.6}{113}$                         |                                             |                      |                   |                     |       | 1     |       |       |       |          |       |       |        |
| 4. Death of denitrifying microorganisms          |                                             |                                             |                                             |                      |                   |                     |       | -1    |       |       |       |          |       |       |        |
| 5. Biodegradation coupled to iron(III) reduction | $-\frac{1}{113}$                            |                                             |                                             |                      | $-\frac{98}{113}$ |                     |       |       |       | 1     |       |          |       |       |        |
| 6. Death of Fe(III)-reducing microorganisms      |                                             |                                             |                                             |                      |                   |                     |       |       |       | -1    |       |          |       |       |        |
| 7. Biodegradation coupled to sulfate reduction   | $-\frac{1}{113}$                            |                                             | $-\frac{12.25}{113}$                        |                      |                   |                     |       |       | 1     |       |       |          |       |       |        |
| 8. Death of sulfate-reducing microorganisms      |                                             |                                             |                                             |                      |                   |                     |       |       | -1    |       |       |          |       |       |        |
| 9. Biodegradation under methanogenic conditions  | $-\frac{1}{113}$                            |                                             |                                             | $-\frac{12.25}{113}$ |                   |                     |       |       |       |       | 1     |          |       |       |        |
| 10. Death of methanogenic microorganisms         |                                             |                                             |                                             |                      |                   |                     |       |       |       |       | -1    |          |       |       |        |
| 11. Adsorption of hydrocarbon                    | $-\rho\left(\frac{1-\theta}{\theta}\right)$ |                                             |                                             |                      |                   |                     |       |       |       |       |       | 1        |       |       |        |
| 12. Adsorption of nitrate                        |                                             | $-\rho\left(\frac{1-\theta}{\theta}\right)$ |                                             |                      |                   |                     |       |       |       |       |       |          | 1     |       |        |
| 13. Adsorption of sulfate                        |                                             |                                             | $-\rho\left(\frac{1-\theta}{\theta}\right)$ |                      |                   |                     |       |       |       |       |       |          |       | 1     |        |
| 14. Re-oxidation of Fe <sup>2+</sup>             |                                             |                                             |                                             |                      |                   |                     |       |       |       |       |       |          |       |       | 1      |

**Table S3.** Values of model parameters and constants

| Name                    | Description                                                     | Value   | Unit              | Reference  |
|-------------------------|-----------------------------------------------------------------|---------|-------------------|------------|
| $n_{TPH}$               | Exponential coefficient from Freundlich isotherm for hexadecane | 0.6712  | -                 | This study |
| $n_{NO_3}$              | Exponential coefficient from Freundlich isotherm for nitrate    | 1.305   | -                 | [1]        |
| $n_{SO_4}$              | Exponential coefficient from Freundlich isotherm for sulfate    | 1.312   | -                 | [2]        |
| $K_{f,NO_3^-}$          | Adsorption constant for nitrate                                 | 0.01265 | L/kg              | [1]        |
| $K_{f,TPH}$             | Adsorption constant for hexadecane                              | 0.00435 | L/kg              | This study |
| $K_{f,SO_4^{2-}}$       | Adsorption constant for sulfate                                 | 0.01315 | L/kg              | [2]        |
| $\beta_{X_{aer}}$       | Temperature correction factor for aerobic microorganisms        | 0.04    | -                 | [3]        |
| $b_{X_{anae}}$          | Temperature correction factor for anaerobic microorganisms      | 0.06    | -                 | [3]        |
| $k$                     | Relaxing constant                                               | 10 000  | h <sup>-1</sup>   | [4]        |
| $k_{FeOx}$              | Iron(II) oxidation constant into iron(III)                      | 1000    | d <sup>-1</sup>   | This study |
| $k_{death,X_{aer},20}$  | Death rate for aerobic microorganisms at 20 °C                  | 0.002   | d <sup>-1</sup>   | [5]        |
| $k_{death,X_{anae},20}$ | Death rate for anaerobic microorganisms at 20 °C                | 0.002   | d <sup>-1</sup>   | [5]        |
| $K_{s,TPH}$             | Half saturation constant for the biodegradation of TPH          | 4.5     | mg/L              | [5]        |
| $K_{s,Fe(OH)_3}$        | Half saturation constant for iron                               | 0.15    | mg/L              | This study |
| $K_{s,NO_3^-}$          | Half saturation constant for nitrate                            | 0.15    | mg/L              | [6]        |
| $K_{s,O_2}$             | Half saturation constant for oxygen                             | 0.1     | mg/L              | [7]        |
| $K_{s,SO_4^{2-}}$       | Half saturation constant for sulfate                            | 0.15    | mg/L              | This study |
| $u_{max,met,20}$        | TPH biodegradation rate under methanogenic conditions at 20 °C  | 0.01367 | d <sup>-1</sup>   | [8]        |
| $u_{max,Fe(III),20}$    | TPH biodegradation rate in the presence of iron(III) at 20 °C   | 0.0199  | d <sup>-1</sup>   | [6]        |
| $u_{max,den,20}$        | TPH biodegradation rate in the presence of nitrate at 20 °C     | 0.114   | d <sup>-1</sup>   | This study |
| $u_{max,aer,20}$        | TPH biodegradation rate in the presence of oxygen at 20 °C      | 0.587   | d <sup>-1</sup>   | This study |
| $u_{max,sulf,20}$       | TPH biodegradation rate in the presence of sulfate at 20 °C     | 0.04    | d <sup>-1</sup>   | [6]        |
| $\rho$                  | Soil density                                                    | 1600    | kg/m <sup>3</sup> | [5]        |
| $\theta$                | Soil porosity                                                   | 0.5     | -                 | [5]        |

**Table S4.** Values of absolute-relative sensitivity (Sens AR) of model parameters on TPH concentration in the liquid and solid phases (expressed as mg/L and g/kg, respectively)

| Rank | C <sub>TPH</sub>        |                    | S <sub>TPH</sub>        |                    |
|------|-------------------------|--------------------|-------------------------|--------------------|
|      | Parameter               | Sensitivity (mg/L) | Parameter               | Sensitivity (g/kg) |
| 1    | $n_{TPH}$               | 79.07              | $u_{max,met,20}$        | 1.305              |
| 2    | $u_{max,met,20}$        | 67.64              | $n_{TPH}$               | 1.004              |
| 3    | $K_{f,TPH}$             | 15.73              | $\theta$                | 0.239              |
| 4    | $\theta$                | 11.49              | $k_{death,X_{anae},20}$ | 0.215              |
| 5    | $k_{death,X_{anae},20}$ | 11.21              | $\rho$                  | 0.211              |
| 6    | $K_{s,TPH}$             | 10.61              | $K_{s,TPH}$             | 0.200              |
| 7    | $\rho$                  | 10.13              | $K_{f,TPH}$             | 0.188              |
| 8    | $n_{NO_3}$              | 0.511              | $n_{NO_3}$              | 0.016              |
| 9    | $u_{max,den,20}$        | 0.319              | $u_{max,den,20}$        | 0.0101             |
| 10   | $u_{max,aer,20}$        | 0.305              | $u_{max,sulf,20}$       | 0.0073             |
| 11   | $k_{death,X_{aer},20}$  | 0.236              | $k_{death,X_{aer},20}$  | 0.0047             |
| 12   | $u_{max,sulf,20}$       | 0.228              | $u_{max,aer,20}$        | 0.0047             |
| 13   | $n_{SO_4^{2-}}$         | 0.118              | $n_{SO_4^{2-}}$         | 0.0036             |
| 14   | $K_{f,NO_3^-}$          | 0.110              | $K_{f,NO_3^-}$          | 0.0035             |
| 15   | $K_{f,SO_4^{2-}}$       | 0.061              | $K_{f,SO_4^{2-}}$       | 0.0018             |
| 16   | $K_{s,O_2}$             | 0.052              | $K_{s,O_2}$             | 0.0009             |
| 17   | $u_{max,Fe(III),20}$    | 0.033              | $u_{max,Fe(III),20}$    | 0.0007             |
| 18   | $K_{s,SO_4^{2-}}$       | 0.004              | $K_{s,SO_4^{2-}}$       | 0.0001             |
| 19   | $k_{FeOx}$              | 0.002              | $k_{FeOx}$              | 0.0000             |
| 20   | $K_{s,Fe(OH)}$          | 0.002              | $K_{s,Fe(OH)}$          | 0.0000             |
| 21   | $K_{s,NO_3^-}$          | 0.002              | $K_{s,NO_3^-}$          | 0.0000             |
| 22   | $k$                     | 0.001              | $k$                     | 0.0000             |
| 23   | $\beta_{X_{anae}}$      | 0.000              | $\beta_{X_{aer}}$       | 0.0000             |
| 24   | $\beta_{X_{aer}}$       | 0.000              | $\beta_{X_{anae}}$      | 0.0000             |

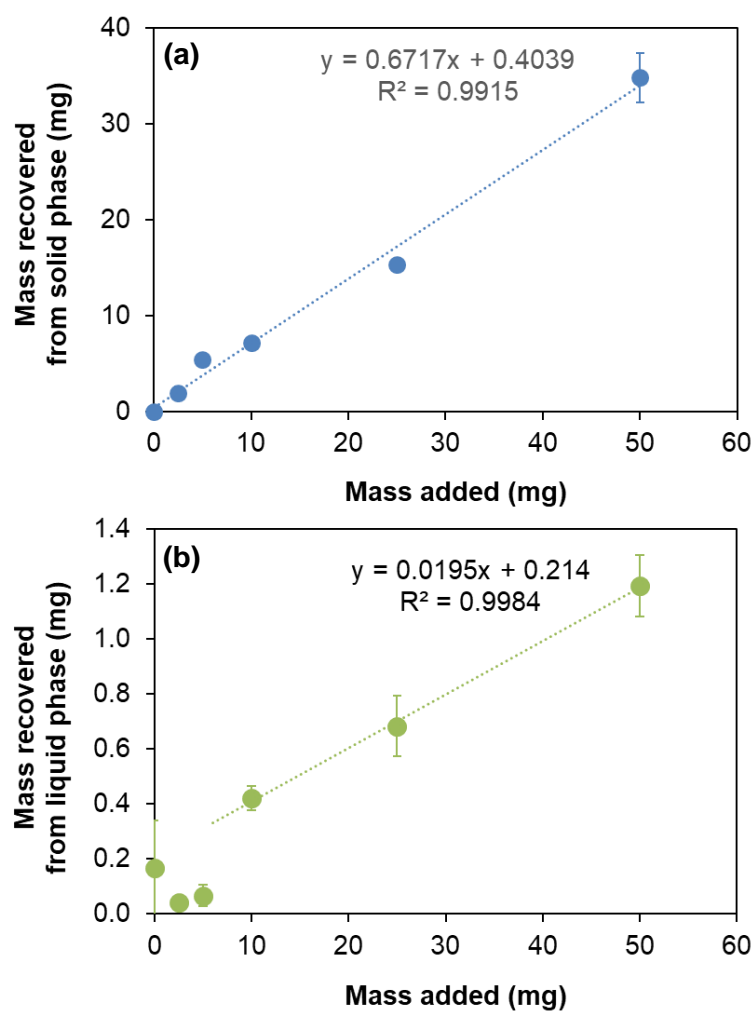

**Figure S1.** Hexadecane mass recovered from solid (a) and liquid (b) phases, relatively to the mass added in the solid-liquid partition experiments. The results presented are the averages and standard deviations for quadruplicate assays.

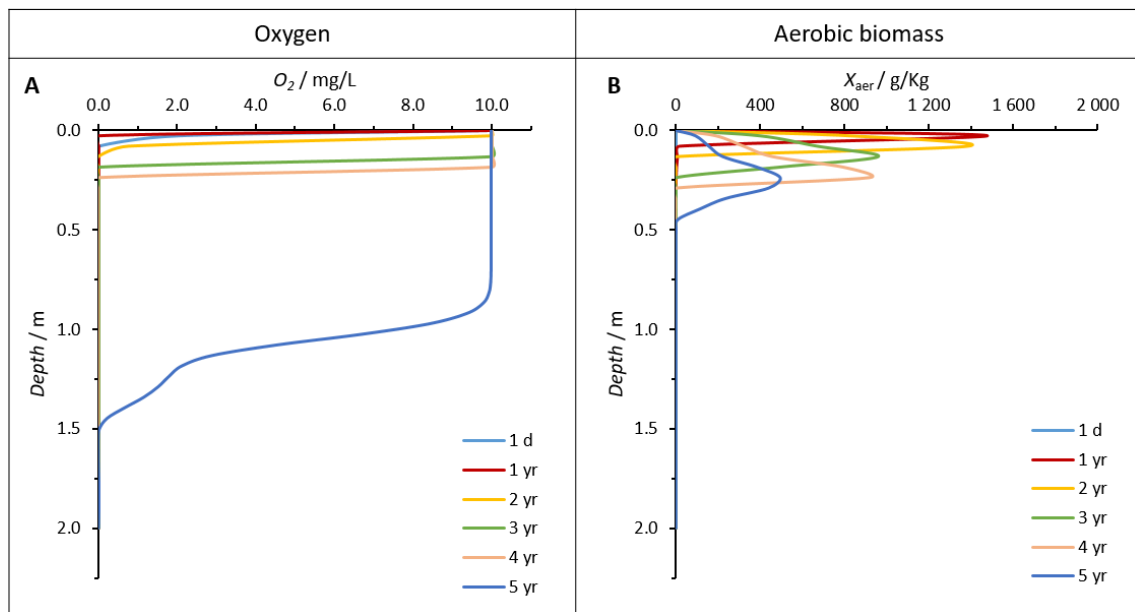

**Figure S2.** Variation of dissolved oxygen (A) and aerobic biomass (B) concentrations in depth.

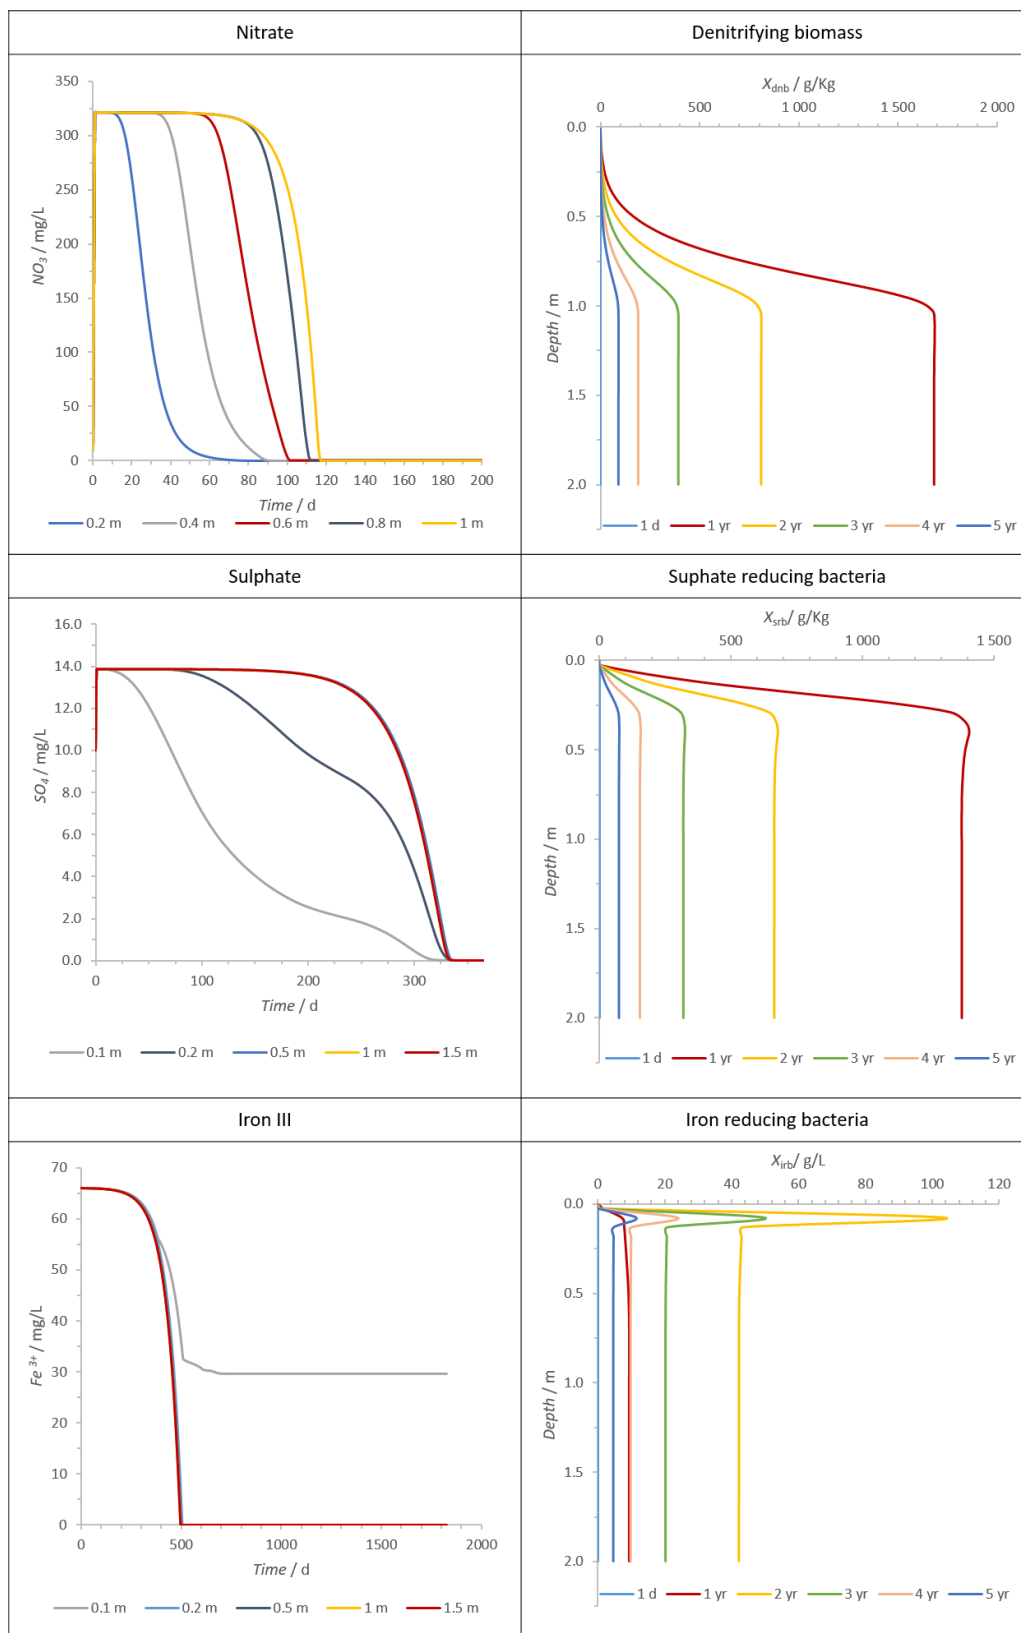

**Figure S3.** Variation of nitrate, sulfate and Fe(III) over time, and denitrifying, sulfate reducing and iron reducing bacteria in depth.

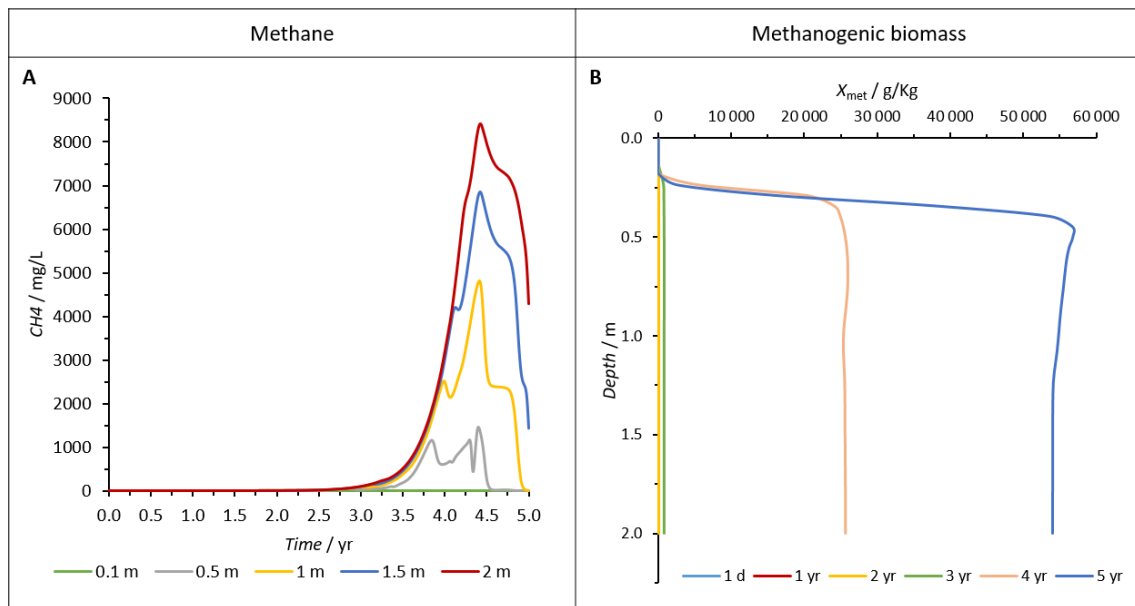

**Figure S4.** Variation of methane concentration over time (A), and of methanogenic biomass concentration in depth (B).

## References

- [1] W. Hamdi, F. Gamaoun, D.E. Pelster, M. Seffen, Nitrate sorption in an agricultural soil profile, *Appl. Environ. Soil Sci.* 2013 (2013). <https://doi.org/10.1155/2013/597824>.
- [2] M.E. Alves, A. Lavorenti, Sulfate adsorption and its relationships with properties of representative soils of the São Paulo State, Brazil, *Geoderma*. 118 (2004) 89–99. [https://doi.org/10.1016/S0016-7061\(03\)00186-1](https://doi.org/10.1016/S0016-7061(03)00186-1).
- [3] G. Martins, D.C.C. Ribeiro, D. Pacheco, J.V. V. Cruz, R. Cunha, V. Gonçalves, R. Nogueira, a. G.G. Brito, Prospective scenarios for water quality and ecological status in Lake Sete Cidades (Portugal): The integration of mathematical modelling in decision processes, *Appl. Geochemistry*. 23 (2008) 2171–2181. <https://doi.org/10.1016/j.apgeochem.2008.03.001>.
- [4] P. Reichert, *Aquasim 2.0-User Manual*, Computer Program for the Identification and Simulation of Aquatic Systems, EAWAG, Dübendorf,



Switzerland, 1998.

- [5] S. Gödeke, C. Vogt, M. Schirmer, Estimation of kinetic Monod parameters for anaerobic degradation of benzene in groundwater, *Environ. Geol.* 55 (2008) 423–431. <https://doi.org/10.1007/s00254-007-0988-z>.
- [6] M.P. Suarez, H.S. Rifai, Biodegradation rates for fuel Hydrocarbons and Chlorinated Solvents in groundwater, *Bioremediat. J.* 3 (1999) 337–362. <https://doi.org/10.1080/10889869991219433>.
- [7] C. Uzuoku, D. Dionisi, Comparison of the Biodegradation of n-alkanes and Readily Biodegradable Substrates Using Open Mixed Culture under Aerobic, Anoxic and Anaerobic Conditions, *Int. J. Environ. Bioremediation Biodegrad.* 5 (2017) 65–76. <https://doi.org/10.12691/ijebb-5-2-5>.
- [8] T.T. Ma, L.Y. Liu, J.P. Rui, Q. Yuan, D.S. Feng, Z. Zhou, L.R. Dai, W.Q. Zeng, H. Zhang, L. Cheng, Coexistence and competition of sulfate-reducing and methanogenic populations in an anaerobic hexadecane-degrading culture, *Biotechnol. Biofuels.* 10 (2017) 1–14. <https://doi.org/10.1186/s13068-017-0895-9>.

## Annex B: AQUASIM system definition

\*\*\*\*\*

### AQUASIM Version 2.1e (win/mfc) - Listing of System Definition

\*\*\*\*\*

Date of listing: 08/30/2022

\*\*\*\*\*

#### Variables

\*\*\*\*\*

A:       Description:       Cross sectional area

          Type:            Formula Variable

          Unit:            m^2

          Expression:     1

-----

alfa\_C16:   Description:       Exponential coefficient from Freund

                         lich isotherm for hexadecane

          Type:            Constant Variable

          Unit:

          Value:           1.4898043

          Standard Deviation: 0.14898

          Minimum:         1.1918

          Maximum:         1.78776

          Sensitivity Analysis: active

          Parameter Estimation: inactive

-----

alfa\_NO3:   Description:       Exponential coefficient from Freund

                         lich isotherm for nitrate

Type: Constant Variable

Unit:

Value: 0.7663

Standard Deviation: 0.07663

Minimum: 0.613

Maximum: 0.92

Sensitivity Analysis: active

Parameter Estimation: inactive

---

alfa\_SO4: Description: Exponential coefficient from Freund

lich isotherm for sulfate

Type: Constant Variable

Unit:

Value: 0.7623

Standard Deviation: 0.07623

Minimum: 0.61

Maximum: 0.915

Sensitivity Analysis: active

Parameter Estimation: inactive

---

beta\_Xaer: Description: Temperature correction factor for a

erobic microorganisms

Type: Constant Variable

Unit:

Value: 0.04

Standard Deviation: 0.004

Minimum: 0.032

Maximum: 0.048

Sensitivity Analysis: active

Parameter Estimation: inactive

---

beta\_Xanaer: Description: Temperature correction factor for a  
naerobic microorganisms

Type: Constant Variable

Unit:

Value: 0.06

Standard Deviation: 0.006

Minimum: 0.048

Maximum: 0.072

Sensitivity Analysis: active

Parameter Estimation: inactive

---

C\_CH4: Description: Methane concentration in the liquid  
phase

Type: Dyn. Volume State Var.

Unit: mg/L

Relative Accuracy: 1e-006

Absolute Accuracy: 1e-006

---

C\_critic: Description: Critic concentration

Type: Constant Variable

Unit: mg/m<sup>3</sup>

Value: 0.001

Standard Deviation: 0.0001

Minimum: 0.0008

Maximum: 0.0012

Sensitivity Analysis: active

Parameter Estimation: inactive

---

C\_Fell: Description: Iron(II) concentration in the liquid phase

Type: Dyn. Volume State Var.

Unit: mg/L

Relative Accuracy: 1e-006

Absolute Accuracy: 1e-006

---

C\_ini\_Fell: Description: Initial concentration of Fell

Type: Formula Variable

Unit: mg/L

Expression: 0

---

C\_ini\_NO3: Description: Initial concentration of NO3

Type: Formula Variable

Unit: mg/L

Expression: 10

---

C\_ini\_SO4: Description: Initial concentration of SO4

Type: Formula Variable

Unit: mg/L

Expression: 10

---

C\_in\_NO3: Description: input concentration of NO3

Type: Formula Variable

Unit: mg/L

Expression: 0

---

C\_in\_SO4: Description: input concentration of SO4

Type: Formula Variable

Unit: mg/L

Expression: 0

---

C\_in\_TPH: Description: input concentration of TPH

Type: Real List Variable

Unit: mg/L

Argument: t

Standard Deviations: global

Rel. Stand. Deviat.: 0

Abs. Stand. Deviat.: 1

Minimum: 0

Maximum: 1e+009

Interpolation Method: linear interpolation

Sensitivity Analysis: inactive

Real Data Pairs (7 pairs):

0 0

1 0

1.1 0

2.1 0

2.2 0

365 0  
3650 0

---

C\_NO3: Description: Nitrate concentration in the liquid  
phase  
Type: Dyn. Volume State Var.  
Unit: mg/L  
Relative Accuracy: 1e-006  
Absolute Accuracy: 1e-006

---

C\_O2: Description: Dissolved oxygen concentration  
Type: Dyn. Volume State Var.  
Unit: mg/L  
Relative Accuracy: 1e-006  
Absolute Accuracy: 1e-006

---

C\_O2\_in: Description: input dissolved oxygen concentration  
n  
Type: Formula Variable  
Unit: mg/L  
Expression: 10

---

C\_SO4: Description: Sulfate concentration in the liquid  
phase  
Type: Dyn. Volume State Var.  
Unit: mg/L  
Relative Accuracy: 1e-006

Absolute Accuracy: 1e-006

---

C\_TPH: Description: Total petroleum hydrocarbon concent

ration in the liquid phase

Type: Dyn. Volume State Var.

Unit:

Relative Accuracy: 1e-006

Absolute Accuracy: 1e-006

---

C\_TPH\_ini: Description: initial soluble concentration of TP

H

Type: Formula Variable

Unit: mg/L

Expression: 0

---

k: Description: Relaxation time constant

Type: Constant Variable

Unit: 1/h

Value: 10000

Standard Deviation: 1000

Minimum: 8000

Maximum: 12000

Sensitivity Analysis: active

Parameter Estimation: inactive

---

Kc\_Fe: Description: Half saturation constant for iron

Type: Constant Variable



Unit: mg/L

Value: 0.15

Standard Deviation: 0.015

Minimum: 0.12

Maximum: 0.18

Sensitivity Analysis: active

Parameter Estimation: inactive

---

Kc\_NO3: Description: Half saturation constant for nitrat

e

Type: Constant Variable

Unit: mg/L

Value: 0.15

Standard Deviation: 0.015

Minimum: 0.12

Maximum: 0.18

Sensitivity Analysis: active

Parameter Estimation: inactive

---

Kc\_O2: Description: Half saturation constant for oxygen

Type: Constant Variable

Unit: mg/L

Value: 0.1

Standard Deviation: 0.01

Minimum: 0.08

Maximum: 0.12

Sensitivity Analysis: active

Parameter Estimation: inactive

---

Kc\_SO4: Description: Half saturation constant for sulfat

e

Type: Constant Variable

Unit: mg/L

Value: 0.15

Standard Deviation: 0.015

Minimum: 0.12

Maximum: 0.18

Sensitivity Analysis: active

Parameter Estimation: inactive

---

Kc\_TPH: Description: Half saturation constant for the bi

odegradation of TPH

Type: Constant Variable

Unit: mg/L

Value: 4.5

Standard Deviation: 0.031

Minimum: 0.248

Maximum: 10

Sensitivity Analysis: active

Parameter Estimation: inactive

---

k\_death\_Xaer: Description: Death rate for aerobic microorganis

ms

Type: Formula Variable

Unit: d-1

Expression:  $k\_death\_Xaer\_20 * \exp(\beta\_Xaer * (T - 20))$

---

k\_death\_Xaer\_20:

Description: Death rate for aerobic microorganism  
at 20 °C

Type: Constant Variable

Unit: d-1

Value: 0.002

Standard Deviation: 0.0002

Minimum: 0.0016

Maximum: 0.04

Sensitivity Analysis: active

Parameter Estimation: inactive

---

k\_death\_Xanaer: Description: Death rate for anaerobic microorganisms

Type: Formula Variable

Unit: d-1

Expression:  $k\_death\_Xanaer\_20 * \exp(\beta\_Xanaer * (T - 20))$

---

k\_death\_Xanaer\_20:

Description: Death rate for anaerobic microorganisms  
at 20 °C

Type: Constant Variable

Unit: d-1  
Value: 0.002  
Standard Deviation: 0.0002  
Minimum: 0.0016  
Maximum: 0.04  
Sensitivity Analysis: active  
Parameter Estimation: inactive

---

k\_FeOx: Description: Iron(II) oxidation constant into iron(III)

Type: Constant Variable  
Unit: d-1  
Value: 1000  
Standard Deviation: 100  
Minimum: 800  
Maximum: 1200  
Sensitivity Analysis: active  
Parameter Estimation: inactive

---

k\_F\_C16: Description: Adsorption constant for hexadecane

Type: Constant Variable  
Unit:  
Value: 0.00435  
Standard Deviation: 0.000435  
Minimum: 0.003484  
Maximum: 0.005226  
Sensitivity Analysis: active

Parameter Estimation: inactive

---

k\_F\_NO3:    Description:    Adsorption constant for nitrate

Type:            Constant Variable

Unit:

Value:           0.001265

Standard Deviation: 0.000127

Minimum:        0.001

Maximum:        0.002

Sensitivity Analysis: active

Parameter Estimation: inactive

---

k\_F\_SO4:    Description:    Adsorption constant for sulfate

Type:            Constant Variable

Unit:

Value:           0.01315

Standard Deviation: 0.001315

Minimum:        0.011

Maximum:        0.016

Sensitivity Analysis: active

Parameter Estimation: inactive

---

Q:            Description:    Water flow into the column

Type:            Program Variable

Unit:            m3/d

Reference to:    Discharge

---

Qin:      Description:      Water flow into the column

Type:              Formula Variable

Unit:              m3/d

Expression:      0.00375

-----

Qin\_t:      Description:      Water flow into the column

Type:              Real List Variable

Unit:              m3/d

Argument:          t

Standard Deviations: global

Rel. Stand. Deviat.: 0

Abs. Stand. Deviat.: 1

Minimum:          0

Maximum:          1e+009

Interpolation Method: linear interpolation

Sensitivity Analysis: inactive

Real Data Pairs (140 pairs):

|      |             |
|------|-------------|
| 0    | 0.005533333 |
| 30   | 0.005533333 |
| 60   | 0.005533333 |
| 90   | 0.005233333 |
| 120  | 0.003966667 |
| .    | .           |
| .    | .           |
| 3555 | 0.000766667 |
| 3585 | 0.0022      |
| 3615 | 0.0044      |

3645 0.005366667

3650 0.005366667

---

Rho\_S: Description: soil density

Type: Constant Variable

Unit: kg/m<sup>3</sup>

Value: 1600

Standard Deviation: 160

Minimum: 1280

Maximum: 1920

Sensitivity Analysis: active

Parameter Estimation: inactive

---

Seq\_freundlick\_C16H34:

Description: Freundlick isotherm

Type: Formula Variable

Unit: mg/kg

Expression: if C\_TPH>C\_critic then k\_F\_C16\*C\_T  
PH<sup>alfa\_C16</sup> else k\_F\_C16\*C\_critic<sup>a</sup>  
lfa\_C16\*C\_TPH/C\_critic endif

---

Seq\_freundlick\_NO3:

Description: Freundlick isotherm

Type: Formula Variable

Unit: mg/kg

Expression: if C\_NO3>C\_critic then k\_F\_NO3\*C\_N  
O3<sup>alfa\_NO3</sup> else k\_F\_NO3\*C\_critic<sup>a</sup>

lfa\_NO3\*C\_NO3/C\_critic endif

---

Seq\_freundlick\_SO4:

Description: Freundlick isotherm

Type: Formula Variable

Unit: mg/kg

Expression: if C\_SO4>C\_critic then k\_F\_SO4\*C\_S  
O4^alfa\_SO4 else k\_F\_SO4\*C\_critic^a  
lfa\_SO4\*C\_SO4/C\_critic endif

---

S\_FeIII: Description: Concentration of amorphous iron

Type: Dyn. Surface State Var.

Unit: g/kg

Relative Accuracy: 1e-006

Absolute Accuracy: 1e-006

---

S\_FeIII\_ini: Description: initial concentration of amorphous  
iron

Type: Formula Variable

Unit: g/kg

Expression: 66

---

S\_NO3: Description: Nitrate concentration in the solid  
phase

Type: Dyn. Surface State Var.

Unit: g/kg

Relative Accuracy: 1e-006



Absolute Accuracy: 1e-006

---

S\_NO3\_ini: Description: initial Nitrate concentration in the solid phase

Type: Formula Variable

Unit: g/kg

Expression: 0.3

---

S\_SO4: Description: Sulfate concentration in the solid phase

Type: Dyn. Surface State Var.

Unit: g/kg

Relative Accuracy: 1e-006

Absolute Accuracy: 1e-006

---

S\_SO4\_ini: Description: initial Sulfate concentration in the solid phase

Type: Formula Variable

Unit: g/kg

Expression: 0.1

---

S\_TPH: Description: Total petroleum hydrocarbon concentration in the solid phase

Type: Dyn. Surface State Var.

Unit: g/kg

Relative Accuracy: 1e-006

Absolute Accuracy: 1e-006

---

S\_TPH\_ini: Description: initial adsorbed concentration TPH

Type: Formula Variable

Unit: g/kg

Expression: 0.6

---

T: Description: Soil temperature

Type: Formula Variable

Unit: degC

Expression: 20

---

t: Description: Time

Type: Program Variable

Unit: d

Reference to: Time

---

theta: Description: soil porosity

Type: Constant Variable

Unit:

Value: 0.5

Standard Deviation: 0.05

Minimum: 0.4

Maximum: 0.6

Sensitivity Analysis: active

Parameter Estimation: inactive

---

umax\_CH4: Description: TPH biodegradation rate under methanogenic conditions

Type: Formula Variable

Unit:

Expression:  $umax\_CH4\_20 * \exp(\beta_{Xanaer} * (T - 20))$

---

umax\_CH4\_20: Description: TPH biodegradation rate under methanogenic conditions at 20 °C

Type: Constant Variable

Unit:

Value: 0.01367

Standard Deviation: 0.001367

Minimum: 0.010936

Maximum: 0.016404

Sensitivity Analysis: active

Parameter Estimation: inactive

---

umax\_FeIII: Description: TPH biodegradation rate in the presence of iron(III)

Type: Formula Variable

Unit: d<sup>-1</sup>

Expression:  $umax\_FeIII\_20 * \exp(\beta_{Xanaer} * (T - 20))$

---

umax\_FeIII\_20: Description: TPH biodegradation rate in the presence of iron(III) at 20 °C

Type: Constant Variable

Unit:

Value: 0.0199

Standard Deviation: 0.00199

Minimum: 0.01791

Maximum: 0.02189

Sensitivity Analysis: active

Parameter Estimation: inactive

---

umax\_NO3: Description: TPH biodegradation rate in the presence of nitrate

Type: Formula Variable

Unit: d-1

Expression:  $umax\_NO3\_20 * \exp(\beta_{Xanaer} * (T - 20))$

---

umax\_NO3\_20: Description: TPH biodegradation rate in the presence of nitrate at 20 C

Type: Constant Variable

Unit: d-1

Value: 0.114

Standard Deviation: 0.0114

Minimum: 0.0912

Maximum: 0.1368

Sensitivity Analysis: active

Parameter Estimation: inactive

---

umax\_O2: Description: TPH biodegradation rate in the presence of oxygen

Type: Formula Variable

Unit: d-1

Expression:  $umax\_O2\_20 * \exp(\beta_{Xaer} * (T - 20))$

---

umax\_O2\_20: Description: TPH biodegradation rate in the pres

ence of oxygen at 20 °C

Type: Constant Variable

Unit: d-1

Value: 0.587

Standard Deviation: 0.0587

Minimum: 0.4696

Maximum: 0.7044

Sensitivity Analysis: active

Parameter Estimation: inactive

---

umax\_SO4: Description: TPH biodegradation rate in the pres

ence of sulfate

Type: Formula Variable

Unit: d-1

Expression:  $umax\_SO4\_20 * \exp(\beta_{Xanaer} * (T - 20))$

---

umax\_SO4\_20: Description: TPH biodegradation rate in the pres

ence of sulfate at 20 °C

Type: Constant Variable

Unit: d-1

Value: 0.04

Standard Deviation: 0.005

Minimum: 0.03

Maximum: 0.05

Sensitivity Analysis: active

Parameter Estimation: inactive

---

X\_aer:      Description:      Concentration of aerobic microorgan  
isms  
Type:              Dyn. Surface State Var.  
Unit:              g/kg  
Relative Accuracy:   1e-006  
Absolute Accuracy:   1e-006

---

X\_aer\_ini:   Description:      initial concentration of aerobic mi  
croorganisms  
Type:              Formula Variable  
Unit:              g/kg  
Expression:        0.08

---

X\_anaer\_ini: Description:      initial concentration of anaerobic  
microorganisms  
Type:              Formula Variable  
Unit:              g/kg  
Expression:        0.04

---

X\_den:      Description:      Concentration of denitrifying micro  
organisms  
Type:              Dyn. Surface State Var.  
Unit:              g/kg  
Relative Accuracy:   1e-006

Absolute Accuracy: 1e-006

---

X\_irb: Description: Concentration of iron reducing micr

oorganisms

Type: Dyn. Surface State Var.

Unit: g/kg

Relative Accuracy: 1e-006

Absolute Accuracy: 1e-006

---

X\_met: Description: Concentration of methanogenic micro

organisms

Type: Dyn. Surface State Var.

Unit: g/kg

Relative Accuracy: 1e-006

Absolute Accuracy: 1e-006

---

X\_met\_ini: Description: initial concentration of methanogen

ic microorganisms

Type: Formula Variable

Unit: g/kg

Expression: 0.02

---

X\_srb: Description: Concentration of sulfate reducing m

icroorganisms

Type: Dyn. Surface State Var.

Unit: g/kg

Relative Accuracy: 1e-006

Absolute Accuracy: 1e-006

-----

Z:       Description:     column depth

          Type:         Program Variable

          Unit:         m

          Reference to:   Space Coordinate Z

\*\*\*\*\*

\*\*\*\*\*

## Processes

\*\*\*\*\*

### adsorption\_C16H34:

          Description:     adsorption isothermic for hexadecane

          Type:         Dynamic Process

          Rate:          $k*(Seq\_freundlick\_C16H34-S\_TPH)$

          Stoichiometry:

              Variable : Stoichiometric Coefficient

              C\_TPH :  $-Rho\_S*(1-theta)/theta$

              S\_TPH : 1

-----

### adsorption\_NO3:Description:     Isothermic adsorption for nitrate

          Type:         Dynamic Process

          Rate:          $k*(Seq\_freundlick\_NO3-S\_NO3)$



Stoichiometry:

Variable : Stoichiometric Coefficient

C\_NO3 :  $-\text{Rho\_S} \cdot (1 - \theta) / \theta$

S\_NO3 : 1

---

adsorption\_SO4: Description: Isothermic adsorption for sulfate

Type: Dynamic Process

Rate:  $k \cdot (\text{Seq\_freundlick\_SO4} - S_{\text{SO4}})$

Stoichiometry:

Variable : Stoichiometric Coefficient

C\_SO4 :  $-\text{Rho\_S} \cdot (1 - \theta) / \theta$

S\_SO4 : 1

---

aerobic\_degradation:

Description: Degradation of TPH in the presence  
of O2

Type: Dynamic Process

Rate:  $u_{\text{max\_O2}} \cdot (C_{\text{TPH}} / (K_{\text{c\_TPH}} + C_{\text{TPH}})) \cdot (C_{\text{O2}} / (K_{\text{c\_O2}} + C_{\text{O2}})) \cdot X_{\text{aer}}$

Stoichiometry:

Variable : Stoichiometric Coefficient

C\_TPH : -1/113

C\_O2 : -24.5/113

X\_aer : 1

---

death\_Xaer: Description: death of aerobic biomass

Type: Dynamic Process

Rate:  $k_{\text{death\_Xaer}} \cdot X_{\text{aer}}$

Stoichiometry:

Variable : Stoichiometric Coefficient

$X_{\text{aer}}$  : -1

---

death\_Xden: Description: death of denitrifiers

Type: Dynamic Process

Rate:  $k_{\text{death\_Xanaer}} \cdot X_{\text{den}}$

Stoichiometry:

Variable : Stoichiometric Coefficient

$X_{\text{den}}$  : -1

---

death\_Xirb: Description: death of iron reducers

Type: Dynamic Process

Rate:  $k_{\text{death\_Xanaer}} \cdot X_{\text{irb}}$

Stoichiometry:

Variable : Stoichiometric Coefficient

$X_{\text{irb}}$  : -1

---

death\_Xmet: Description: death of methanogens

Type: Dynamic Process

Rate:  $k_{\text{death\_Xanaer}} \cdot X_{\text{met}}$

Stoichiometry:

Variable : Stoichiometric Coefficient

$X_{\text{met}}$  : -1

---

death\_Xsrb: Description: death of sulfate reducers

Type: Dynamic Process

Rate:  $k_{\text{death\_Xanaer}} \cdot X_{\text{srb}}$

Stoichiometry:

Variable : Stoichiometric Coefficient

$X_{\text{srb}} : -1$

---

#### denitrification:

Description: Degradation of TPH in the presence of NO<sub>3</sub>

Type: Dynamic Process

Rate:  $u_{\text{max\_NO3}} \cdot (C_{\text{TPH}} / (K_{\text{c\_TPH}} + C_{\text{TPH}})) \cdot (K_{\text{c\_O2}} / (K_{\text{c\_O2}} + C_{\text{O2}})) \cdot (C_{\text{NO3}} / (K_{\text{c\_NO3}} + C_{\text{NO3}})) \cdot X_{\text{den}}$

Stoichiometry:

Variable : Stoichiometric Coefficient

$C_{\text{TPH}} : -1/113$

$C_{\text{NO3}} : -19.6/113$

$X_{\text{den}} : 1$

---

#### iron\_reduction:Description: Degradation of TPH in the presence of Fe(III)

Type: Dynamic Process

Rate:  $u_{\text{max\_FeIII}} \cdot (C_{\text{TPH}} / (K_{\text{c\_TPH}} + C_{\text{TPH}})) \cdot (K_{\text{c\_O2}} / (K_{\text{c\_O2}} + C_{\text{O2}})) \cdot (S_{\text{FeIII}} / (K_{\text{c\_Fe}} + S_{\text{FeIII}})) \cdot X_{\text{irb}}$

Stoichiometry:

Variable : Stoichiometric Coefficient

C\_TPH : -1/113

S\_FeIII : -98/113

X\_irb : 1

C\_FeII : 98/113

---

methanogenesis:Description: conversion of TPH to methane

Type: Dynamic Process

Rate:  $u_{\max\_CH4} * (C\_TPH / (Kc\_TPH + C\_TPH)) * (Kc\_O2 / (Kc\_O2 + C\_O2)) * X\_met$

Stoichiometry:

Variable : Stoichiometric Coefficient

C\_TPH : -1/113

C\_CH4 : 12.25/113

X\_met : 1

---

r\_FeOx: Description:

Type: Dynamic Process

Rate:  $k\_FeOx * C\_FeII * C\_O2$

Stoichiometry:

Variable : Stoichiometric Coefficient

C\_FeII : -1

S\_FeIII : 1

---

sulfate\_reduction:

Description: Degradation of TPH in the presence  
of SO4

Type: Dynamic Process

Rate: 
$$\text{umax\_SO4} * (\text{C\_TPH} / (\text{Kc\_TPH} + \text{C\_TPH})) * (\text{Kc\_O2} / (\text{Kc\_O2} + \text{C\_O2})) * (\text{C\_SO4} / (\text{Kc\_SO4} + \text{C\_SO4})) * \text{X\_srb}$$

Stoichiometry:

Variable : Stoichiometric Coefficient

C\_TPH : -1/113

C\_SO4 : -12.25/113

X\_srb : 1

\*\*\*\*\*

\*\*\*\*\*

Compartments

\*\*\*\*\*

soil\_column: Description:

Type: Soil Column Compartment

Compartment Index: 0

Active Variables: C\_TPH, C\_FeII, C\_NO3, C\_O2, C\_SO4,

S\_TPH, S\_NO3, S\_SO4, X\_aer, X\_den,

S\_FeIII, C\_CH4, X\_irb, X\_met, X\_srb

Active Processes: adsorption\_NO3, adsorption\_SO4, dea

th\_Xaer, death\_Xden, death\_Xirb, de

ath\_Xmet, death\_Xsrb, r\_FeOx, adsor

ption\_C16H34, aerobic\_degradation,

denitrification, iron\_reduction, me

thanogenesis, sulfate\_reduction

Initial Conditions:

Variable(Zone) : Initial Condition

S\_TPH(Advective Zone) : S\_TPH\_ini

S\_NO3(Advective Zone) : S\_NO3\_ini

S\_SO4(Advective Zone) : S\_SO4\_ini

X\_aer(Advective Zone) : X\_aer\_ini

X\_irb(Advective Zone) : X\_anaer\_ini

X\_met(Advective Zone) : X\_met\_ini

X\_srb(Advective Zone) : X\_anaer\_ini

X\_den(Advective Zone) : X\_anaer\_ini

C\_TPH(Advective Zone) : C\_TPH\_ini

C\_NO3(Advective Zone) : C\_ini\_NO3

C\_SO4(Advective Zone) : C\_ini\_SO4

C\_FeII(Advective Zone) : C\_ini\_FeII

S\_FeIII(Advective Zone) : S\_FeIII\_ini

Q(Advective Zone) : Qin

Inflow: Qin\_t

Loadings:

Variable : Loading

C\_TPH : C\_in\_TPH\*Qin\_t

C\_O2 : C\_O2\_in\*Qin\_t

C\_NO3 : C\_in\_NO3\*Qin\_t

C\_SO4 : C\_in\_SO4\*Qin\_t

Lateral Inflow: 0

Start Coordinate: 0

End Coordinate: 2

Cross Section: A

Adv. Vol. Fract.: theta

Parallel Zones:

Num. of Grid Pts: 40 (high resolution)

Accuracies:

Rel. Acc. Q: 0.0001

Abs. Acc. Q: 1e-006

Rel. Acc. D: 1e-006

Abs. Acc. D: 1e-006

\*\*\*\*\*

\*\*\*\*\*

#### Definitions of Calculations

\*\*\*\*\*

calc0: Description:

Calculation Number: 0

Initial Time: 0

Initial State: given, made consistent

Step Size: 1

Num. Steps: 1825

Status: active for simulation

active for sensitivity analysis

\*\*\*\*\*

\*\*\*\*\*

## Plot Definitions

\*\*\*\*\*

C\_CH4: Description:

Abscissa: Time

Title:

Abscissa Label: time / d

Ordinate Label: C\_CH4 / mg/L

Curves:

Type : Variable [CalcNum,Comp.,Zone,Time/Space]

Value : C\_CH4 [0,soil\_column,Advective Zone,1]

Value : C\_CH4 [0,soil\_column,Advective Zone,0.1]

Value : C\_CH4 [0,soil\_column,Advective Zone,2]

Value : C\_CH4 [0,soil\_column,Advective Zone,0.5]

Value : C\_CH4 [0,soil\_column,Advective Zone,1.5]

-----

C\_CH4\_depth: Description:

Abscissa: Space

Title:

Abscissa Label: depth / m

Ordinate Label: C\_CH4 / mg/L



Curves:

Type : Variable [CalcNum,Comp.,Zone,Time/Space]

Value : C\_CH4 [0,soil\_column,Advective Zone,1]

Value : C\_CH4 [0,soil\_column,Advective Zone,365]

Value : C\_CH4 [0,soil\_column,Advective Zone,730]

Value : C\_CH4 [0,soil\_column,Advective Zone,1095]

Value : C\_CH4 [0,soil\_column,Advective Zone,1460]

Value : C\_CH4 [0,soil\_column,Advective Zone,1825]

Value : C\_CH4 [0,soil\_column,Advective Zone,2190]

Value : C\_CH4 [0,soil\_column,Advective Zone,2555]

Value : C\_CH4 [0,soil\_column,Advective Zone,2920]

Value : C\_CH4 [0,soil\_column,Advective Zone,3285]

Value : C\_CH4 [0,soil\_column,Advective Zone,3650]

---

C\_Fell: Description:

Abscissa: Time

Title:

Abscissa Label: time / d

Ordinate Label: C\_Fell / mg/L

Curves:

Type : Variable [CalcNum,Comp.,Zone,Time/Space]

Value : C\_Fell [0,soil\_column,Advective Zone,1]

Value : C\_Fell [0,soil\_column,Advective Zone,0.1]

Value : C\_Fell [0,soil\_column,Advective Zone,2]

---

C\_Fell\_depth: Description:

Abscissa: Space

Title:

Abscissa Label: depth / m

Ordinate Label: C\_FeII / mg/L

Curves:

Type : Variable [CalcNum,Comp.,Zone,Time/Space]

Value : C\_FeII [0,soil\_column,Advective Zone,1]

Value : C\_FeII [0,soil\_column,Advective Zone,365]

Value : C\_FeII [0,soil\_column,Advective Zone,730]

Value : C\_FeII [0,soil\_column,Advective Zone,1095]

Value : C\_FeII [0,soil\_column,Advective Zone,1460]

Value : C\_FeII [0,soil\_column,Advective Zone,1825]

Value : C\_FeII [0,soil\_column,Advective Zone,2190]

Value : C\_FeII [0,soil\_column,Advective Zone,2555]

Value : C\_FeII [0,soil\_column,Advective Zone,2920]

Value : C\_FeII [0,soil\_column,Advective Zone,3285]

Value : C\_FeII [0,soil\_column,Advective Zone,3650]

-----  
C\_NO3: Description:

Abscissa: Time

Title:

Abscissa Label: time / d

Ordinate Label: C\_NO3 / mg/L

Curves:

Type : Variable [CalcNum,Comp.,Zone,Time/Space]

Value : C\_NO3 [0,soil\_column,Advective Zone,1]

Value : C\_NO3 [0,soil\_column,Advective Zone,0.01]

Value : C\_NO3 [0,soil\_column,Advective Zone,0.2]

Value : C\_NO3 [0,soil\_column,Advective Zone,0.4]

Value : C\_NO3 [0,soil\_column,Advective Zone,0.6]

Value : C\_NO3 [0,soil\_column,Advective Zone,0.8]

---

C\_NO3\_depth: Description:

Abscissa: Space

Title:

Abscissa Label: depth / m

Ordinate Label: C\_NO3 / mg/L

Curves:

Type : Variable [CalcNum,Comp.,Zone,Time/Space]

Value : C\_NO3 [0,soil\_column,Advective Zone,1]

Value : C\_NO3 [0,soil\_column,Advective Zone,365]

Value : C\_NO3 [0,soil\_column,Advective Zone,730]

Value : C\_NO3 [0,soil\_column,Advective Zone,1095]

Value : C\_NO3 [0,soil\_column,Advective Zone,1460]

Value : C\_NO3 [0,soil\_column,Advective Zone,1825]

Value : C\_NO3 [0,soil\_column,Advective Zone,2190]

Value : C\_NO3 [0,soil\_column,Advective Zone,2555]

Value : C\_NO3 [0,soil\_column,Advective Zone,2920]

Value : C\_NO3 [0,soil\_column,Advective Zone,3285]

Value : C\_NO3 [0,soil\_column,Advective Zone,3650]

---

C\_O2: Description:

Abscissa: Time

Title:

Abscissa Label: time / d

Ordinate Label: C\_O2 / mg/L

Curves:

Type : Variable [CalcNum,Comp.,Zone,Time/Space]

Value : C\_O2 [0,soil\_column,Advective Zone,1]

Value : C\_O2 [0,soil\_column,Advective Zone,0]

Value : C\_O2 [0,soil\_column,Advective Zone,2]

---

C\_O2\_depth: Description:

Abscissa: Space

Title:

Abscissa Label: depth / m

Ordinate Label: C\_O2 / mg/L

Curves:

Type : Variable [CalcNum,Comp.,Zone,Time/Space]

Value : C\_O2 [0,soil\_column,Advective Zone,1]

Value : C\_O2 [0,soil\_column,Advective Zone,365]

Value : C\_O2 [0,soil\_column,Advective Zone,730]

Value : C\_O2 [0,soil\_column,Advective Zone,1095]

Value : C\_O2 [0,soil\_column,Advective Zone,1460]

Value : C\_O2 [0,soil\_column,Advective Zone,1825]

Value : C\_O2 [0,soil\_column,Advective Zone,2190]

Value : C\_O2 [0,soil\_column,Advective Zone,2555]

Value : C\_O2 [0,soil\_column,Advective Zone,2920]

Value : C\_O2 [0,soil\_column,Advective Zone,3285]

Value : C\_O2 [0,soil\_column,Advective Zone,3650]

---

C\_SO4: Description:

Abscissa: Time

Title:

Abscissa Label: time / d

Ordinate Label: C\_SO4 / mg/L

Curves:

Type : Variable [CalcNum,Comp.,Zone,Time/Space]

Value : C\_SO4 [0,soil\_column,Advective Zone,1]

Value : C\_SO4 [0,soil\_column,Advective Zone,0.1]

Value : C\_SO4 [0,soil\_column,Advective Zone,2]

---

C\_SO4\_1: Description:

Abscissa: Time

Title:

Abscissa Label: time / d

Ordinate Label: C\_SO4 / mg/L

Curves:

Type : Variable [CalcNum,Comp.,Zone,Time/Space]

Value : C\_SO4 [0,soil\_column,Advective Zone,1]

Value : C\_SO4 [0,soil\_column,Advective Zone,0.01]

Value : C\_SO4 [0,soil\_column,Advective Zone,0.1]

Value : C\_SO4 [0,soil\_column,Advective Zone,0.2]

Value : C\_SO4 [0,soil\_column,Advective Zone,0.5]

Value : C\_SO4 [0,soil\_column,Advective Zone,1.5]

---

C\_SO4\_depth: Description:

Abscissa: Space

Title:

Abscissa Label: depth / m

Ordinate Label: C\_SO4 / mg/L

Curves:

Type : Variable [CalcNum,Comp.,Zone,Time/Space]

Value : C\_SO4 [0,soil\_column,Advective Zone,1]

Value : C\_SO4 [0,soil\_column,Advective Zone,365]

Value : C\_SO4 [0,soil\_column,Advective Zone,730]

Value : C\_SO4 [0,soil\_column,Advective Zone,1095]

Value : C\_SO4 [0,soil\_column,Advective Zone,1460]

Value : C\_SO4 [0,soil\_column,Advective Zone,1825]

Value : C\_SO4 [0,soil\_column,Advective Zone,2190]

Value : C\_SO4 [0,soil\_column,Advective Zone,2555]

Value : C\_SO4 [0,soil\_column,Advective Zone,2920]

Value : C\_SO4 [0,soil\_column,Advective Zone,3285]

Value : C\_SO4 [0,soil\_column,Advective Zone,3650]

-----  
C\_TPH: Description:

Abscissa: Time

Title:

Abscissa Label: time / d

Ordinate Label: C\_TPH / mg/L

Curves:

Type : Variable [CalcNum,Comp.,Zone,Time/Space]

Value : C\_TPH [0,soil\_column,Advective Zone,1]

Value : C\_TPH [0,soil\_column,Advective Zone,0.01]

Value : C\_TPH [0,soil\_column,Advective Zone,2]

Value : C\_TPH [0,soil\_column,Advective Zone,0.1]

Value : C\_TPH [0,soil\_column,Advective Zone,0.2]

Value : C\_TPH [0,soil\_column,Advective Zone,0.4]

Value : C\_TPH [0,soil\_column,Advective Zone,0.6]

Value : C\_TPH [0,soil\_column,Advective Zone,0.8]

---

C\_TPH\_depth: Description:

Abscissa: Space

Title:

Abscissa Label: depth / m

Ordinate Label: C\_TPH / mg/L

Curves:

Type : Variable [CalcNum,Comp.,Zone,Time/Space]

Value : C\_TPH [0,soil\_column,Advective Zone,1]

Value : C\_TPH [0,soil\_column,Advective Zone,365]

Value : C\_TPH [0,soil\_column,Advective Zone,730]

Value : C\_TPH [0,soil\_column,Advective Zone,1095]

Value : C\_TPH [0,soil\_column,Advective Zone,1460]

Value : C\_TPH [0,soil\_column,Advective Zone,1825]

Value : C\_TPH [0,soil\_column,Advective Zone,2190]

Value : C\_TPH [0,soil\_column,Advective Zone,2555]

Value : C\_TPH [0,soil\_column,Advective Zone,2920]

Value : C\_TPH [0,soil\_column,Advective Zone,3285]

Value : C\_TPH [0,soil\_column,Advective Zone,3650]

---

S\_FeIII: Description:

Abscissa: Time

Title:

Abscissa Label: time / d

Ordinate Label: S\_FeIII / g/kg

Curves:

Type : Variable [CalcNum,Comp.,Zone,Time/Space]

Value : S\_FeIII [0,soil\_column,Advective Zone,1]

Value : S\_FeIII [0,soil\_column,Advective Zone,0.1]

Value : S\_FeIII [0,soil\_column,Advective Zone,2]

-----  
S\_FeIII\_1: Description:

Abscissa: Time

Title:

Abscissa Label: time / d

Ordinate Label: S\_FeIII / g/Kg

Curves:

Type : Variable [CalcNum,Comp.,Zone,Time/Space]

Value : S\_FeIII [0,soil\_column,Advective Zone,1]

Value : S\_FeIII [0,soil\_column,Advective Zone,0.01]

Value : S\_FeIII [0,soil\_column,Advective Zone,0.1]

Value : S\_FeIII [0,soil\_column,Advective Zone,0.2]

Value : S\_FeIII [0,soil\_column,Advective Zone,0.5]

Value : S\_FeIII [0,soil\_column,Advective Zone,1.5]

-----  
S\_FeIII\_depth: Description:

Abscissa: Space

Title:

Abscissa Label: depth / m

Ordinate Label: S\_FeIII/ g/kg



Curves:

Type : Variable [CalcNum,Comp.,Zone,Time/Space]

Value : S\_FeIII [0,soil\_column,Advective Zone,1]

Value : S\_FeIII [0,soil\_column,Advective Zone,365]

Value : S\_FeIII [0,soil\_column,Advective Zone,730]

Value : S\_FeIII [0,soil\_column,Advective Zone,1095]

Value : S\_FeIII [0,soil\_column,Advective Zone,1460]

Value : S\_FeIII [0,soil\_column,Advective Zone,1825]

Value : S\_FeIII [0,soil\_column,Advective Zone,2190]

Value : S\_FeIII [0,soil\_column,Advective Zone,2555]

Value : S\_FeIII [0,soil\_column,Advective Zone,2920]

Value : S\_FeIII [0,soil\_column,Advective Zone,3285]

Value : S\_FeIII [0,soil\_column,Advective Zone,3650]

---

S\_NO3: Description:

Abscissa: Time

Title:

Abscissa Label: time / d

Ordinate Label: S\_NO3 / g/kg

Curves:

Type : Variable [CalcNum,Comp.,Zone,Time/Space]

Value : S\_NO3 [0,soil\_column,Advective Zone,1]

Value : S\_NO3 [0,soil\_column,Advective Zone,0.1]

Value : S\_NO3 [0,soil\_column,Advective Zone,2]

---

S\_NO3\_depth: Description:

Abscissa: Space

Title:

Abscissa Label: depth / m

Ordinate Label: S\_NO3/ g/kg

Curves:

Type : Variable [CalcNum,Comp.,Zone,Time/Space]

Value : S\_NO3 [0,soil\_column,Advective Zone,1]

Value : S\_NO3 [0,soil\_column,Advective Zone,365]

Value : S\_NO3 [0,soil\_column,Advective Zone,730]

Value : S\_NO3 [0,soil\_column,Advective Zone,1095]

Value : S\_NO3 [0,soil\_column,Advective Zone,1460]

Value : S\_NO3 [0,soil\_column,Advective Zone,1825]

Value : S\_NO3 [0,soil\_column,Advective Zone,2190]

Value : S\_NO3 [0,soil\_column,Advective Zone,2555]

Value : S\_NO3 [0,soil\_column,Advective Zone,2920]

Value : S\_NO3 [0,soil\_column,Advective Zone,3285]

Value : S\_NO3 [0,soil\_column,Advective Zone,3650]

-----  
S\_SO4: Description:

Abscissa: Time

Title:

Abscissa Label: time / d

Ordinate Label: S\_SO4 / g/kg

Curves:

Type : Variable [CalcNum,Comp.,Zone,Time/Space]

Value : S\_SO4 [0,soil\_column,Advective Zone,1]

Value : S\_SO4 [0,soil\_column,Advective Zone,0.1]

Value : S\_SO4 [0,soil\_column,Advective Zone,2]

-----  
S\_SO4\_depth: Description:

Abscissa: Space

Title:

Abscissa Label: depth / m

Ordinate Label: S\_SO4/ g/kg

Curves:

Type : Variable [CalcNum,Comp.,Zone,Time/Space]

Value : S\_SO4 [0,soil\_column,Advective Zone,1]

Value : S\_SO4 [0,soil\_column,Advective Zone,365]

Value : S\_SO4 [0,soil\_column,Advective Zone,730]

Value : S\_SO4 [0,soil\_column,Advective Zone,1095]

Value : S\_SO4 [0,soil\_column,Advective Zone,1460]

Value : S\_SO4 [0,soil\_column,Advective Zone,1825]

Value : S\_SO4 [0,soil\_column,Advective Zone,2190]

Value : S\_SO4 [0,soil\_column,Advective Zone,2555]

Value : S\_SO4 [0,soil\_column,Advective Zone,2920]

Value : S\_SO4 [0,soil\_column,Advective Zone,3285]

Value : S\_SO4 [0,soil\_column,Advective Zone,3650]

-----

S\_TPH: Description:

Abscissa: Time

Title:

Abscissa Label: time / d

Ordinate Label: S\_TPH/ g/kg

Curves:

Type : Variable [CalcNum,Comp.,Zone,Time/Space]

Value : S\_TPH [0,soil\_column,Advective Zone,1]

Value : S\_TPH [0,soil\_column,Advective Zone,0.1]

Value : S\_TPH [0,soil\_column,Advective Zone,2]

---

S\_TPH\_1: Description:

Abscissa: Time

Title:

Abscissa Label: time / d

Ordinate Label: S\_TPH / g/Kg

Curves:

Type : Variable [CalcNum,Comp.,Zone,Time/Space]

Value : S\_TPH [0,soil\_column,Advective Zone,1]

Value : S\_TPH [0,soil\_column,Advective Zone,0.01]

Value : S\_TPH [0,soil\_column,Advective Zone,2]

Value : S\_TPH [0,soil\_column,Advective Zone,0.1]

Value : S\_TPH [0,soil\_column,Advective Zone,0.2]

Value : S\_TPH [0,soil\_column,Advective Zone,0.4]

Value : S\_TPH [0,soil\_column,Advective Zone,0.6]

Value : S\_TPH [0,soil\_column,Advective Zone,0.8]

---

S\_TPH\_depth: Description:

Abscissa: Space

Title:

Abscissa Label: depth / m

Ordinate Label: S\_C16\_H34/ g/kg

Curves:

Type : Variable [CalcNum,Comp.,Zone,Time/Space]

Value : S\_TPH [0,soil\_column,Advective Zone,1]  
 Value : S\_TPH [0,soil\_column,Advective Zone,365]  
 Value : S\_TPH [0,soil\_column,Advective Zone,730]  
 Value : S\_TPH [0,soil\_column,Advective Zone,1095]  
 Value : S\_TPH [0,soil\_column,Advective Zone,1460]  
 Value : S\_TPH [0,soil\_column,Advective Zone,1825]  
 Value : S\_TPH [0,soil\_column,Advective Zone,2190]  
 Value : S\_TPH [0,soil\_column,Advective Zone,2555]  
 Value : S\_TPH [0,soil\_column,Advective Zone,2920]  
 Value : S\_TPH [0,soil\_column,Advective Zone,3285]  
 Value : S\_TPH [0,soil\_column,Advective Zone,3650]

---

X\_aer: Description:

Abscissa: Time

Title:

Abscissa Label: time / d

Ordinate Label: X\_aer / g/kg

Curves:

Type : Variable [CalcNum,Comp.,Zone,Time/Space]

Value : X\_aer [0,soil\_column,Advective Zone,1]

Value : X\_aer [0,soil\_column,Advective Zone,0.1]

Value : X\_aer [0,soil\_column,Advective Zone,2]

---

X\_aer\_depth: Description:

Abscissa: Space

Title:

Abscissa Label: depth / m

Ordinate Label: X\_aer/ g/kg

Curves:

Type : Variable [CalcNum,Comp.,Zone,Time/Space]

Value : X\_aer [0,soil\_column,Advective Zone,1]

Value : X\_aer [0,soil\_column,Advective Zone,365]

Value : X\_aer [0,soil\_column,Advective Zone,730]

Value : X\_aer [0,soil\_column,Advective Zone,1095]

Value : X\_aer [0,soil\_column,Advective Zone,1460]

Value : X\_aer [0,soil\_column,Advective Zone,1825]

Value : X\_aer [0,soil\_column,Advective Zone,2190]

Value : X\_aer [0,soil\_column,Advective Zone,2555]

Value : X\_aer [0,soil\_column,Advective Zone,2920]

Value : X\_aer [0,soil\_column,Advective Zone,3285]

Value : X\_aer [0,soil\_column,Advective Zone,3650]

---

X\_den: Description:

Abscissa: Time

Title:

Abscissa Label: time / d

Ordinate Label: X\_anaer / g/kg

Curves:

Type : Variable [CalcNum,Comp.,Zone,Time/Space]

Value : X\_den [0,soil\_column,Advective Zone,1]

Value : X\_den [0,soil\_column,Advective Zone,0.1]

Value : X\_den [0,soil\_column,Advective Zone,2]

---

X\_den\_depth: Description:

Abscissa: Space

Title:

Abscissa Label: depth / m

Ordinate Label: X\_anae/ g/kg

Curves:

Type : Variable [CalcNum,Comp.,Zone,Time/Space]

Value : X\_den [0,soil\_column,Advective Zone,1]

Value : X\_den [0,soil\_column,Advective Zone,365]

Value : X\_den [0,soil\_column,Advective Zone,730]

Value : X\_den [0,soil\_column,Advective Zone,1095]

Value : X\_den [0,soil\_column,Advective Zone,1460]

Value : X\_den [0,soil\_column,Advective Zone,1825]

Value : X\_den [0,soil\_column,Advective Zone,2190]

Value : X\_den [0,soil\_column,Advective Zone,2555]

Value : X\_den [0,soil\_column,Advective Zone,2920]

Value : X\_den [0,soil\_column,Advective Zone,3285]

Value : X\_den [0,soil\_column,Advective Zone,3650]

-----  
X\_irb\_depth: Description:

Abscissa: Space

Title:

Abscissa Label: depth / m

Ordinate Label: X\_anae/ g/kg

Curves:

Type : Variable [CalcNum,Comp.,Zone,Time/Space]

Value : X\_irb [0,soil\_column,Advective Zone,1]

Value : X\_irb [0,soil\_column,Advective Zone,365]

Value : X\_irb [0,soil\_column,Advective Zone,730]

Value : X\_irb [0,soil\_column,Advective Zone,1095]

Value : X\_irb [0,soil\_column,Advective Zone,1460]

Value : X\_irb [0,soil\_column,Advective Zone,1825]

Value : X\_irb [0,soil\_column,Advective Zone,2190]

Value : X\_irb [0,soil\_column,Advective Zone,2555]

Value : X\_irb [0,soil\_column,Advective Zone,2920]

Value : X\_irb [0,soil\_column,Advective Zone,3285]

Value : X\_irb [0,soil\_column,Advective Zone,3650]

---

X\_met\_depth: Description:

Abscissa:        Space

Title:

Abscissa Label:    depth / m

Ordinate Label:    X\_anae/ g/kg

Curves:

Type : Variable [CalcNum,Comp.,Zone,Time/Space]

Value : X\_met [0,soil\_column,Advective Zone,1]

Value : X\_met [0,soil\_column,Advective Zone,365]

Value : X\_met [0,soil\_column,Advective Zone,730]

Value : X\_met [0,soil\_column,Advective Zone,1095]

Value : X\_met [0,soil\_column,Advective Zone,1460]

Value : X\_met [0,soil\_column,Advective Zone,1825]

Value : X\_met [0,soil\_column,Advective Zone,2190]

Value : X\_met [0,soil\_column,Advective Zone,2555]

Value : X\_met [0,soil\_column,Advective Zone,2920]

Value : X\_met [0,soil\_column,Advective Zone,3285]



Value : X\_met [0,soil\_column,Advective Zone,3650]

-----  
X\_srb\_depth: Description:

Abcissa:       Space

Title:

Abcissa Label:    depth / m

Ordinate Label:   X\_anae/ g/kg

Curves:

Type : Variable [CalcNum,Comp.,Zone,Time/Space]

Value : X\_srb [0,soil\_column,Advective Zone,1]

Value : X\_srb [0,soil\_column,Advective Zone,365]

Value : X\_srb [0,soil\_column,Advective Zone,730]

Value : X\_srb [0,soil\_column,Advective Zone,1095]

Value : X\_srb [0,soil\_column,Advective Zone,1460]

Value : X\_srb [0,soil\_column,Advective Zone,1825]

Value : X\_srb [0,soil\_column,Advective Zone,2190]

Value : X\_srb [0,soil\_column,Advective Zone,2555]

Value : X\_srb [0,soil\_column,Advective Zone,2920]

Value : X\_srb [0,soil\_column,Advective Zone,3285]

Value : X\_srb [0,soil\_column,Advective Zone,3650]

\*\*\*\*\*

\*\*\*\*\*

## Calculation Parameters

\*\*\*\*\*

Numerical Parameters: Maximum Int. Step Size: 8

Maximum Integrat. Order: 5

Number of Codiagonals: 100

Maximum Number of Steps: 1000

-----

Fit Method: secant

Max. Number of Iterat.: 100

\*\*\*\*\*
